# Supplementary material for: A simple one-step procedure to synthesise gold nanostars in concentrated aqueous surfactant solutions
Source: PubMed Central journal article supplement (PMC9069482; doi:10.1039/c9ra02384d), 2019-07-30
Supplement: RA-009-C9RA02384D-s001.pdf [file RA-009-C9RA02384D-s001.pdf]

## Supporting Information

### A simple one-step procedure to gold nanostars in concentrated aqueous surfactant solutions

Ferenc Liebig<sup>a</sup>, Ricky Henning<sup>a</sup>, Radwan M. Sarhan<sup>b,c,d</sup>, Claudia Prietzel<sup>a</sup>, Clemens N.Z. Schmitt<sup>e</sup>,  
Matias Bargheer<sup>b</sup>, Joachim Koetz<sup>a,\*</sup>

<sup>a</sup>University of Potsdam, Institute for Chemistry and <sup>b</sup>Institute for Physics, , 14476 Potsdam, Germany

<sup>c</sup>Cairo University, Chemistry Department, Faculty of Science, Cairo 12613, Egypt

<sup>d</sup>Humboldt-Universität zu Berlin, School of Analytical Sciences Adlershof (SALSA), 10099 Berlin,  
Germany

<sup>e</sup>Max Planck Institute of Colloids and Interfaces, 14476 Potsdam, Germany

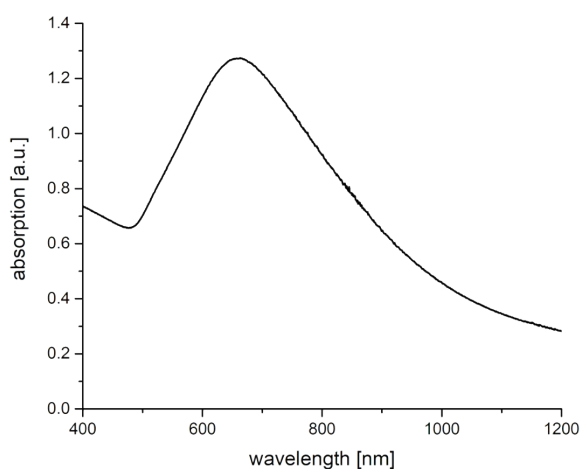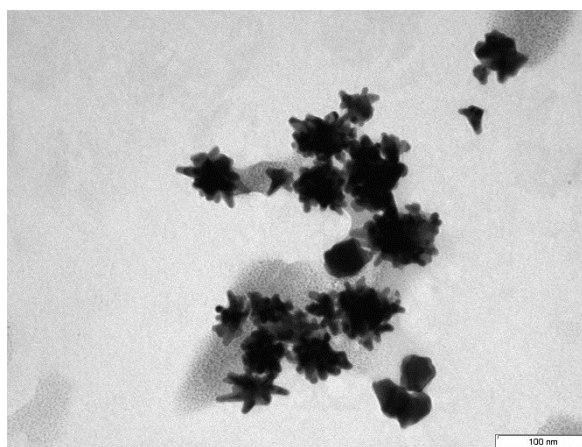

**Fig. S1** Absorption spectra of SDS stabilized AuNSs and corresponding TEM micrograph.

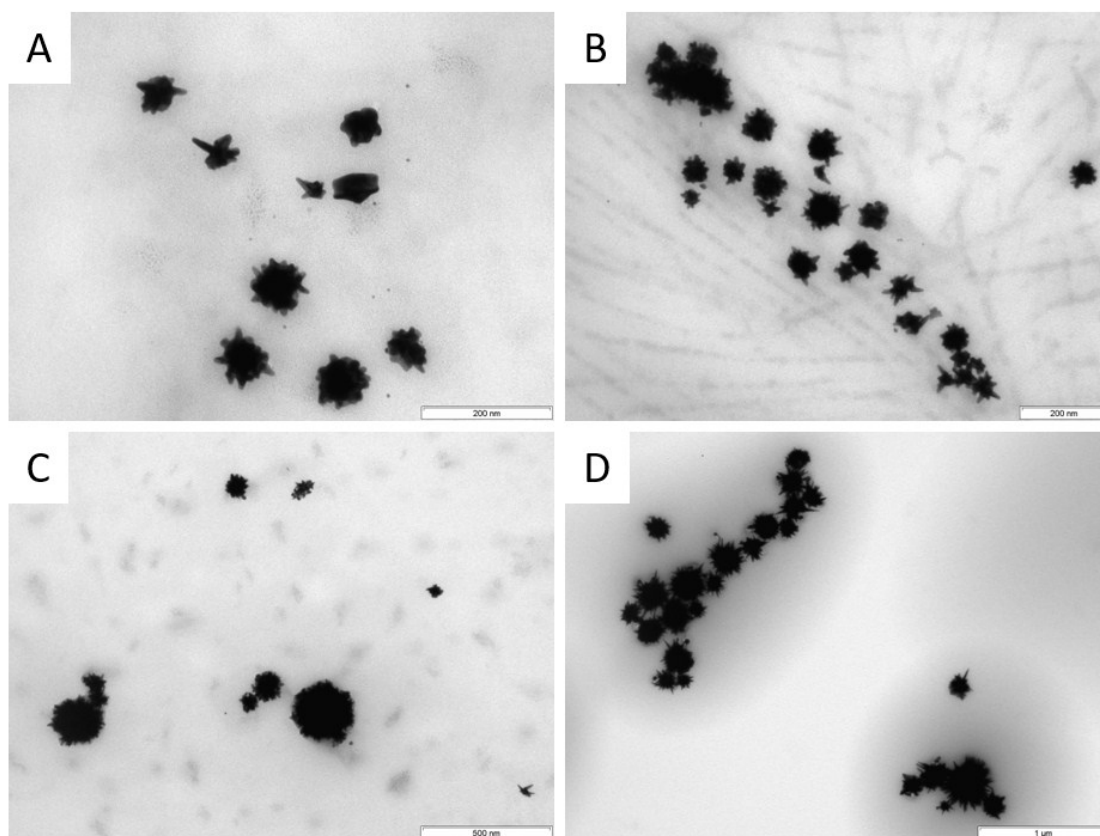

**Fig. S2** TEM micrographs of AOT-BDAC stabilized AuNSs at different BDAC concentration. (A) 0.001 M, (B) 0.005 M, (C) 0.01 M, (D) 0.05 M at lower magnification.

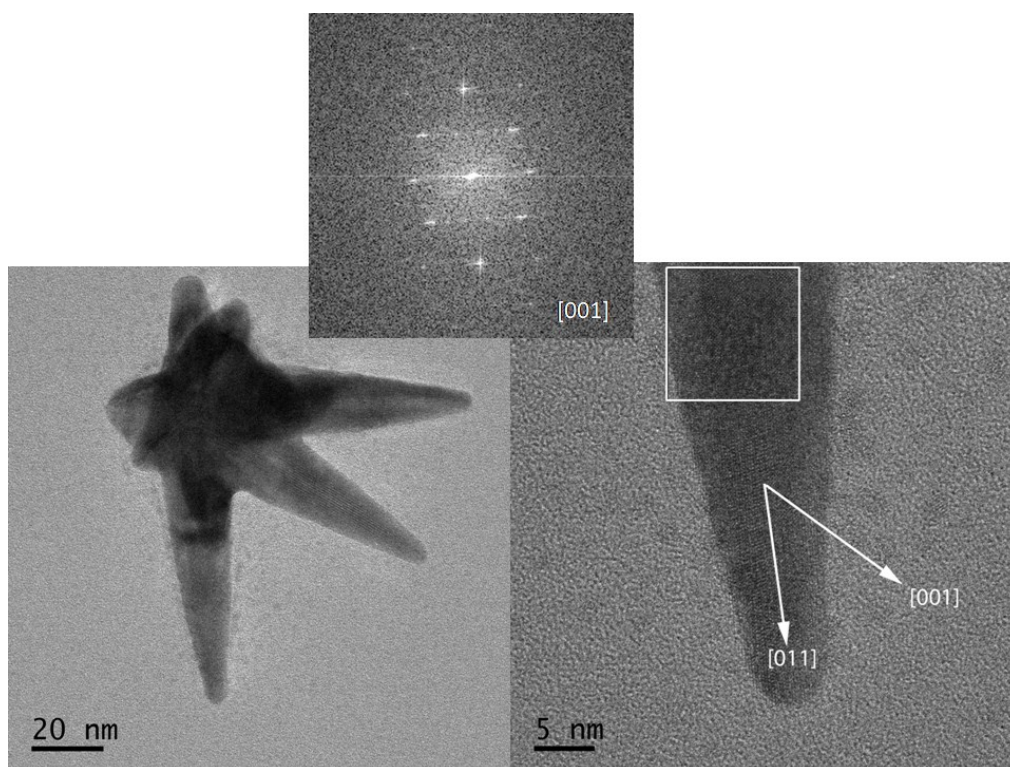

**Fig. S3** Single nanostar TEM micrograph including HRTEM of the spike with corresponding FFT pattern of the marked square area.

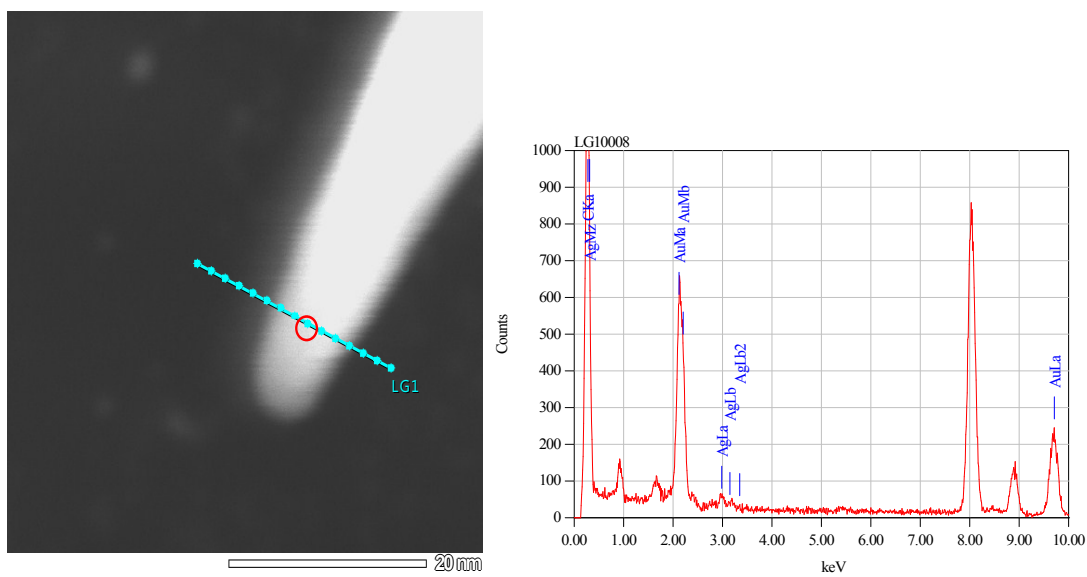

**Fig. S4** Dark field TEM micrograph of an AuNS-spike with the corresponding EDX spectrum

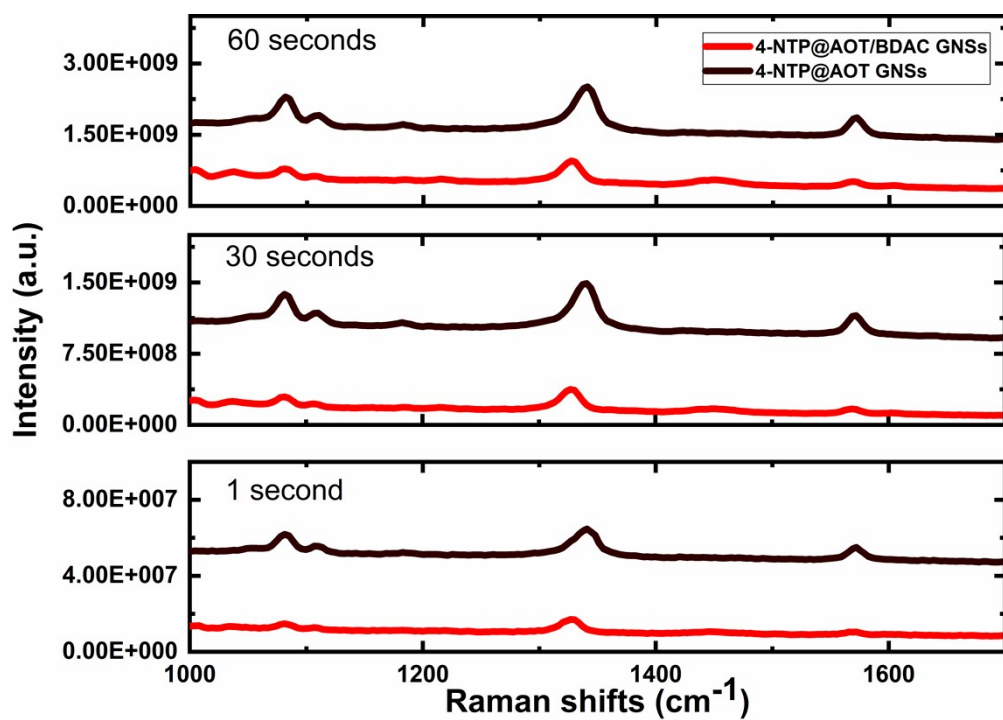

**Fig. S5** Raman spectra at a low 4-NTP concentration ( $10^{-6}$  M) in dependence on the integration time
